# Supplementary material
Source: PubMed Central journal article supplement (PMC8885874)
Supplement: NIHMS1773869-supplement-1.pdf [file NIHMS1773869-supplement-1.pdf]

## SUPPLEMENTAL TABLES

## Supplemental Table 1

Plasma cytokine levels (pg/mL) by average levels of perceived stressor severity ( $N = 92$ )

|                                             | Interleukin-6       | Interleukin-8       | Interleukin-1 $\beta$ | Tumor necrosis factor- $\alpha$ |
|---------------------------------------------|---------------------|---------------------|-----------------------|---------------------------------|
| Overall average perceived stressor severity |                     |                     |                       |                                 |
| Low tertile                                 | 0.651 (0.527-1.073) | 2.652 (2.052-3.931) | 0.065 (0.053-0.088)   | 1.560 (1.432-1.781)             |
| Mid-tertile                                 | 0.681 (0.444-0.923) | 2.662 (2.131-3.283) | 0.079 (0.047-0.117)   | 1.611 (1.425-1.723)             |
| High tertile                                | 0.776 (0.586-1.035) | 3.634 (2.588-4.521) | 0.089 (0.073-0.105)   | 1.545 (1.300-1.953)             |
| Chronic average perceived stressor severity |                     |                     |                       |                                 |
| Low tertile                                 | 0.605 (0.469-1.073) | 2.611 (2.180-4.173) | 0.070 (0.050-0.097)   | 1.551 (1.432-1.667)             |
| Mid-tertile                                 | 0.712 (0.561-0.945) | 2.700 (2.240-3.766) | 0.094 (0.061-0.142)   | 1.545 (1.385-1.761)             |
| High tertile                                | 0.794 (0.578-1.278) | 3.281 (2.745-4.050) | 0.074 (0.058-0.086)   | 1.676 (1.458-1.953)             |
| Acute average perceived stressor severity   |                     |                     |                       |                                 |
| Low tertile                                 | 0.606 (0.527-1.303) | 2.604 (1.903-3.748) | 0.060 (0.042-0.075)   | 1.560 (1.329-1.781)             |
| Mid-tertile                                 | 0.816 (0.563-0.984) | 2.956 (2.247-3.745) | 0.084 (0.053-0.137)   | 1.533 (1.425-1.976)             |
| High tertile                                | 0.687 (0.403-1.023) | 3.455 (2.542-4.917) | 0.093 (0.073-0.117)   | 1.584 (1.454-1.955)             |

Notes: Results are presented in pg/mL as median (interquartile range)
